# Supplementary material for: Landscapes of bacterial and metabolic signatures and their interaction in major depressive disorders
Source: PubMed Central journal article supplement — Sci Adv. 2020 Dec 2;6(49):eaba8555. doi: 10.1126/sciadv.aba8555 (PMC7710361; doi:10.1126/sciadv.aba8555), 2020-12-02
Supplement: supp_6_49_eaba8555__1.pdf [file supp_6_49_eaba8555__1.pdf]

## Supplementary Materials for

### **Landscapes of bacterial and metabolic signatures and their interaction in major depressive disorders**

Jian Yang, Peng Zheng, Yifan Li, Jing Wu, Xunmin Tan, Jingjing Zhou, Zuoli Sun, Xu Chen, Guofu Zhang, Hanping Zhang, Yu Huang, Tingjia Chai, Jiajia Duan, Weiwei Liang, Bangmin Yin, Jianbo Lai, Tingting Huang, Yanli Du, Peifen Zhang, Jiajun Jiang, Caixi Xi, Lingling Wu, Jing Lu, Tingting Mou, Yi Xu, Seth W. Perry, Ma-Li Wong, Julio Licinio, Shaohua Hu\*, Gang Wang\*, Peng Xie\*

\*Corresponding author. Email: xiepeng@cqmu.edu.cn (P.X.); gangwangdoc@gmail.com (G.W.); dorhushaohua@zju.edu.cn (S.H.)

Published 2 December 2020, *Sci. Adv.* **6**, eaba8555 (2020)  
DOI: 10.1126/sciadv.aba8555

#### **This PDF file includes:**

Tables S1 to S6

**Table S1. Detailed clinical characteristics of the recruited subjects.**

|                        | Discovery set |            |         | Validation set |            |         |
|------------------------|---------------|------------|---------|----------------|------------|---------|
|                        | HC            | MDD        | p-value | HC             | MDD        | p-value |
| <b>Samples</b>         | 118           | 118        | -       | 37             | 38         | -       |
| <b>Gender (male %)</b> | 43.22%        | 43.22%     | 1       | 35.14%         | 13.16%     | 0.026   |
| <b>Age</b>             | 26.86±5.24    | 27.19±4.71 | 0.178   | 36.39±10.75    | 37.07±9.45 | 0.77    |
| <b>BMI</b>             | 22.09±3.33    | 22.50±3.56 | 0.357   | 23.34±3.22     | 21.56±2.92 | 0.15    |
| <b>HAMD-17</b>         | -             | 22.03±5.08 | -       | -              | 22.63±3.43 | -       |
| <b>QIDS-16</b>         |               | 15.8±3.93  | -       |                | 15.43±3.61 | -       |
| <b>Medication</b>      | 0             | 0          | -       | 0              | 38         | -       |

**Abbreviations:** HC, Healthy controls; MDD, major depressive disorder; BMI, Body Mass Index; HAMD, The Hamilton Depression Rating Scale; QIDS, Quick Inventory of Depressive Symptomatology. Analysis of Variance for continuous variables (Age and BMI);

**Table S2. Differential bacteria species between MDD and HC groups.**

| Family                        | Genus                         | Species                           | HC      |         | MDD     |         | Fold change<br>(MDD/HC) | Enrichment | LDA  | p value | RF<br>Importance |
|-------------------------------|-------------------------------|-----------------------------------|---------|---------|---------|---------|-------------------------|------------|------|---------|------------------|
|                               |                               |                                   | mean    | sem     | mean    | sem     |                         |            |      |         |                  |
| Lachnospiraceae               | Blautia                       | Blautia_obeum                     | 1.0E-02 | 1.1E-03 | 7.6E-03 | 9.0E-04 | 0.73                    | HC         | 3.14 | 3.4E-03 | 0.016754         |
| Clostridiaceae                | Clostridium                   | Clostridium_sp._CAG:217           | 2.7E-03 | 5.8E-04 | 1.2E-03 | 4.1E-04 | 0.44                    | HC         | 2.85 | 3.4E-03 | 0.020179         |
| Bacteroidaceae                | Bacteroides                   | Bacteroides_thetaiotaomicron      | 4.7E-03 | 5.3E-04 | 6.2E-03 | 6.3E-04 | 1.32                    | MDD        | 2.92 | 1.5E-02 | 0.022699         |
| Bifidobacteriaceae            | Bifidobacterium               | Bifidobacterium_longum            | 5.8E-03 | 8.2E-04 | 9.9E-03 | 1.5E-03 | 1.70                    | MDD        | 3.30 | 3.2E-02 | 0.0251           |
| Veillonellaceae               | Veillonella                   | Veillonella_sp._CAG:933           | 1.2E-03 | 4.4E-04 | 1.5E-03 | 8.1E-04 | 1.24                    | MDD        | 2.57 | 1.5E-02 | 0.027337         |
| Eubacteriaceae                | Eubacterium                   | Eubacterium_sp._CAG:202           | 5.6E-03 | 1.6E-03 | 2.9E-03 | 1.0E-03 | 0.52                    | HC         | 3.04 | 1.5E-02 | 0.017609         |
| Ruminococcaceae               | Faecalibacterium              | Faecalibacterium_sp._CAG:74       | 4.8E-03 | 1.3E-03 | 1.8E-03 | 4.1E-04 | 0.37                    | HC         | 3.17 | 2.3E-02 | 0.014343         |
| Lachnospiraceae               | Coprococcus                   | Coprococcus_eutactus              | 2.7E-03 | 4.8E-04 | 1.7E-03 | 3.1E-04 | 0.65                    | HC         | 2.66 | 4.9E-02 | 0.016643         |
| Lachnospiraceae               | Anaerostipes                  | Anaerostipes_hadrus               | 4.9E-03 | 7.4E-04 | 3.6E-03 | 6.5E-04 | 0.74                    | HC         | 2.82 | 1.8E-02 | 0.015131         |
| unclassified_o__Bacteroidales | unclassified_o__Bacteroidales | unclassified_o__Bacteroidales     | 9.9E-03 | 7.8E-04 | 1.3E-02 | 8.7E-04 | 1.29                    | MDD        | 3.17 | 2.3E-02 | 0.010661         |
| Bacteroidaceae                | Bacteroides                   | Bacteroides_stercoris             | 6.5E-03 | 1.3E-03 | 1.5E-02 | 2.2E-03 | 2.26                    | MDD        | 3.61 | 1.5E-02 | 0.01889          |
| Bacteroidaceae                | Bacteroides                   | Bacteroides_stercoris_CAG:120     | 1.2E-03 | 2.7E-04 | 2.9E-03 | 4.7E-04 | 2.36                    | MDD        | 2.92 | 3.7E-02 | 0.020478         |
| Bacteroidaceae                | Bacteroides                   | unclassified_g__Bacteroides       | 4.1E-02 | 3.9E-03 | 5.5E-02 | 4.3E-03 | 1.35                    | MDD        | 3.86 | 1.1E-02 | 0.012472         |
| Eggerthellaceae               | Adlercreutzia                 | Adlercreutzia_equolifaciens       | 2.9E-03 | 5.6E-04 | 2.0E-03 | 4.0E-04 | 0.71                    | HC         | 2.68 | 3.1E-03 | 0.026401         |
| unclassified_p__Firmicutes    | unclassified_p__Firmicutes    | Firmicutes_bacterium_CAG:227      | 1.5E-03 | 3.4E-04 | 6.5E-04 | 1.2E-04 | 0.43                    | HC         | 2.64 | 4.8E-04 | 0.032782         |
| Bacteroidaceae                | Bacteroides                   | Bacteroides_fragilis              | 7.0E-03 | 5.4E-04 | 9.4E-03 | 8.2E-04 | 1.35                    | MDD        | 3.12 | 1.5E-02 | 0.012717         |
| unclassified_c__Bacilli       | unclassified_c__Bacilli       | unclassified_c__Bacilli           | 6.8E-04 | 6.5E-04 | 1.7E-05 | 4.5E-06 | 0.03                    | HC         | 2.62 | 1.4E-02 | 0.020248         |
| Eubacteriaceae                | Eubacterium                   | Eubacterium_sp._CAG:156           | 1.3E-03 | 4.0E-04 | 1.0E-03 | 4.5E-04 | 0.78                    | HC         | 2.54 | 1.7E-03 | 0.023715         |
| Lachnospiraceae               | Blautia                       | Blautia_sp._GD8                   | 1.7E-03 | 2.1E-04 | 1.1E-03 | 9.7E-05 | 0.65                    | HC         | 2.52 | 6.9E-03 | 0.014202         |
| Ruminococcaceae               | Ruminococcus                  | Ruminococcus_sp._5_1_39BFAA       | 2.1E-03 | 3.9E-04 | 1.3E-03 | 1.2E-04 | 0.58                    | HC         | 2.62 | 5.2E-03 | 0.017367         |
| Lachnospiraceae               | Dorea                         | Dorea_sp._CAG:105                 | 1.8E-03 | 4.4E-04 | 1.0E-03 | 2.7E-04 | 0.56                    | HC         | 2.65 | 1.8E-04 | 0.030339         |
| Bifidobacteriaceae            | Bifidobacterium               | unclassified_g__Bifidobacterium   | 1.8E-03 | 2.4E-04 | 2.8E-03 | 4.0E-04 | 1.59                    | MDD        | 2.71 | 1.8E-02 | 0.026248         |
| Eubacteriaceae                | Eubacterium                   | [Eubacterium]_hallii              | 8.7E-03 | 1.1E-03 | 4.2E-03 | 5.5E-04 | 0.49                    | HC         | 3.34 | 8.8E-05 | 0.029314         |
| Enterococcaceae               | Enterococcus                  | Enterococcus_faecalis             | 1.8E-03 | 1.4E-03 | 3.4E-04 | 1.9E-05 | 0.19                    | HC         | 2.97 | 3.5E-02 | 0.013192         |
| Acidaminococcaceae            | Phascolarctobacterium         | Phascolarctobacterium_sp._CAG:207 | 4.0E-03 | 6.6E-04 | 5.3E-03 | 6.6E-04 | 1.31                    | MDD        | 2.84 | 5.2E-03 | 0.026834         |
| Eubacteriaceae                | Eubacterium                   | Eubacterium_hallii_CAG:12         | 1.5E-03 | 2.1E-04 | 6.9E-04 | 1.0E-04 | 0.46                    | HC         | 2.60 | 1.5E-04 | 0.023777         |
| Bacteroidaceae                | Bacteroides                   | Bacteroides_massiliensis          | 3.6E-03 | 6.9E-04 | 7.1E-03 | 1.3E-03 | 1.95                    | MDD        | 3.28 | 1.5E-02 | 0.016174         |
| Bacteroidaceae                | Bacteroides                   | Bacteroides_dorei                 | 6.9E-03 | 8.0E-04 | 1.1E-02 | 1.2E-03 | 1.56                    | MDD        | 3.25 | 6.0E-03 | 0.01422          |

|                            |                            |                              |         |         |         |         |      |     |      |         |          |
|----------------------------|----------------------------|------------------------------|---------|---------|---------|---------|------|-----|------|---------|----------|
| Lachnospiraceae            | Blautia                    | Blautia_wexlerae             | 8.6E-03 | 1.4E-03 | 5.4E-03 | 4.5E-04 | 0.62 | HC  | 3.18 | 9.6E-03 | 0.013673 |
| Ruminococcaceae            | Faecalibacterium           | Faecalibacterium_prausnitzii | 5.4E-02 | 4.3E-03 | 4.1E-02 | 3.0E-03 | 0.76 | HC  | 3.80 | 4.5E-02 | 0.017864 |
| Ruminococcaceae            | Subdoligranulum            | Subdoligranulum_variabale    | 2.2E-02 | 2.3E-03 | 1.4E-02 | 1.6E-03 | 0.65 | HC  | 3.54 | 8.5E-03 | 0.012576 |
| Lachnospiraceae            | Blautia                    | Blautia_sp._Marseille-P2398  | 2.0E-03 | 3.5E-04 | 1.2E-03 | 1.1E-04 | 0.58 | HC  | 2.59 | 3.8E-03 | 0.017873 |
| Oscillospiraceae           | Oscillibacter              | Oscillibacter_sp._ER4        | 4.1E-03 | 4.2E-04 | 3.0E-03 | 4.9E-04 | 0.74 | HC  | 2.70 | 2.4E-02 | 0.02115  |
| Enterobacteriaceae         | Citrobacter                | Citrobacter_freundii         | 1.2E-03 | 8.0E-04 | 1.4E-04 | 3.3E-05 | 0.12 | HC  | 2.78 | 6.4E-03 | 0.018924 |
| Bacteroidaceae             | Bacteroides                | Bacteroides_vulgatus         | 2.4E-02 | 2.9E-03 | 3.7E-02 | 3.7E-03 | 1.51 | MDD | 3.79 | 2.6E-03 | 0.018394 |
| Enterobacteriaceae         | Klebsiella                 | unclassified_g__Klebsiella   | 1.2E-03 | 4.5E-04 | 6.5E-04 | 2.3E-04 | 0.53 | HC  | 2.58 | 7.0E-05 | 0.055891 |
| Clostridiaceae             | Clostridium                | Clostridium_sp._CAG:510      | 8.8E-04 | 6.3E-04 | 1.8E-04 | 1.6E-05 | 0.21 | HC  | 2.56 | 4.0E-03 | 0.025147 |
| Clostridiaceae             | Clostridium                | Clostridium_sp._CAG:62       | 1.2E-03 | 3.3E-04 | 5.0E-04 | 1.1E-04 | 0.43 | HC  | 2.54 | 1.8E-02 | 0.017738 |
| Bacteroidaceae             | Bacteroides                | Bacteroides_ovatus           | 7.4E-03 | 9.5E-04 | 8.8E-03 | 9.3E-04 | 1.20 | MDD | 2.96 | 2.0E-02 | 0.01711  |
| Eubacteriaceae             | Eubacterium                | Eubacterium_ventriosum       | 3.3E-03 | 3.7E-04 | 2.3E-03 | 3.2E-04 | 0.70 | HC  | 2.69 | 4.1E-03 | 0.022971 |
| Porphyromonadaceae         | Parabacteroides            | Parabacteroides_distasonis   | 2.8E-03 | 2.5E-04 | 3.7E-03 | 2.9E-04 | 1.33 | MDD | 2.65 | 4.9E-03 | 0.015958 |
| Eubacteriaceae             | Eubacterium                | Eubacterium_sp._CAG:146      | 1.6E-03 | 1.9E-04 | 2.4E-03 | 4.9E-04 | 1.52 | MDD | 2.53 | 2.4E-03 | 0.04402  |
| Enterobacteriaceae         | Klebsiella                 | Klebsiella_pneumoniae        | 7.4E-03 | 2.8E-03 | 3.7E-03 | 1.3E-03 | 0.51 | HC  | 3.37 | 1.9E-03 | 0.027132 |
| Eubacteriaceae             | Eubacterium                | Eubacterium_sp._CAG:180      | 8.1E-03 | 1.9E-03 | 9.4E-03 | 2.7E-03 | 1.16 | MDD | 3.19 | 2.1E-02 | 0.021554 |
| unclassified_p__Firmicutes | unclassified_p__Firmicutes | Firmicutes_bacterium_CAG:41  | 6.0E-03 | 9.5E-04 | 3.7E-03 | 4.9E-04 | 0.61 | HC  | 3.02 | 1.4E-03 | 0.03475  |
| Lachnospiraceae            | Blautia                    | Blautia_sp._CAG:237          | 2.3E-03 | 1.2E-03 | 8.4E-04 | 1.5E-04 | 0.36 | HC  | 2.93 | 1.2E-02 | 0.015097 |
| Bacteroidaceae             | Bacteroides                | Bacteroides_eggerthii        | 2.5E-03 | 7.5E-04 | 3.1E-03 | 7.8E-04 | 1.26 | MDD | 2.68 | 1.0E-02 | 0.016354 |

**Table S3. Differential gut virus between MDD and HC groups.**

| Family       | Species                         | HC      |         | MDD     |         | Fold change<br>(MDD/HC) | Enrichment | LDA  | p value | RF<br>Importance |
|--------------|---------------------------------|---------|---------|---------|---------|-------------------------|------------|------|---------|------------------|
|              |                                 | mean    | sem     | mean    | sem     |                         |            |      |         |                  |
| Siphoviridae | Clostridium_phage_phi8074-B1    | 4.8E-04 | 2.5E-04 | 2.7E-04 | 1.2E-04 | 0.55                    | HC         | 2.92 | 6.9E-03 | 0.237184         |
| Podoviridae  | Escherichia_phage_ECBP5         | 2.3E-04 | 8.5E-05 | 3.4E-03 | 3.4E-03 | 14.40                   | MDD        | 3.41 | 1.8E-18 | 0.614219         |
| Podoviridae  | Klebsiella_phage_vB_KpnP_SU552A | 1.1E-03 | 7.7E-04 | 4.7E-04 | 3.4E-04 | 0.44                    | HC         | 2.69 | 2.4E-04 | 0.148597         |

**Table S4. Protozoa and fungi data in MDD and HC groups.**

| Classification | Family                             | Species                         | HC      |         | MDD     |         |
|----------------|------------------------------------|---------------------------------|---------|---------|---------|---------|
|                |                                    |                                 | mean    | sem     | mean    | sem     |
| Protozoa       | f__Reticulomyxidae                 | s__Reticulomyxa_filosa          | 9.3E-03 | 2.6E-03 | 1.7E-02 | 5.9E-03 |
| Protozoa       | f__Thalassiosiraceae               | s__Thalassiosira_oceanica       | 6.4E-03 | 2.4E-03 | 3.9E-03 | 6.8E-04 |
| Protozoa       | f__Sarcocystidae                   | s__Toxoplasma_gondii            | 4.2E-03 | 1.7E-03 | 1.8E-02 | 9.0E-03 |
| Protozoa       | f__Noelaerhabdaceae                | s__Emiliania_huxleyi            | 6.3E-02 | 7.7E-03 | 3.9E-02 | 5.0E-03 |
| Protozoa       | f__Plasmodiidae                    | s__Plasmodium_yoelii            | 7.7E-03 | 2.3E-03 | 2.5E-03 | 7.1E-04 |
| Protozoa       | f__Ectocarpaceae                   | s__Ectocarpus_siliculosus       | 6.9E-03 | 1.5E-03 | 1.2E-02 | 4.3E-03 |
| Protozoa       | f__unclassified_d__Eukaryota       | s__Blastocystis_sp._subtype_1   | 1.8E-02 | 5.2E-03 | 2.4E-02 | 7.5E-03 |
| Protozoa       | f__Phaeodactylaceae                | s__Phaeodactylum_tricornutum    | 3.1E-03 | 9.2E-04 | 5.2E-03 | 2.6E-03 |
| Protozoa       | f__Eimeriidae                      | s__Eimeria_acervulina           | 2.2E-03 | 9.0E-04 | 2.6E-03 | 6.9E-04 |
| Protozoa       | f__Cyanidiaceae                    | s__Cyanidioschyzon_merolae      | 2.0E-02 | 3.6E-03 | 2.2E-02 | 3.7E-03 |
| Protozoa       | f__Trypanosomatidae                | s__Angomonas_deanei             | 1.4E-03 | 3.6E-04 | 3.2E-03 | 1.2E-03 |
| Protozoa       | f__Saprolegniaceae                 | s__Aphanomyces_invadans         | 2.8E-02 | 4.5E-03 | 2.8E-02 | 3.2E-03 |
| Protozoa       | f__unclassified_o__Ichthyophonida  | s__Sphaeroforma_arctica         | 5.5E-03 | 1.7E-03 | 3.6E-03 | 1.2E-03 |
| Protozoa       | f__Codonosigidae                   | s__Monosiga_brevicollis         | 2.3E-02 | 5.6E-03 | 2.2E-02 | 6.0E-03 |
| Protozoa       | f__Trypanosomatidae                | s__Leishmania_major             | 3.1E-03 | 7.9E-04 | 6.1E-03 | 1.9E-03 |
| Protozoa       | f__unclassified_o__Hymenostomatida | s__Ichthyophthirius_multifiliis | 4.2E-03 | 9.5E-04 | 5.7E-03 | 2.7E-03 |
| Protozoa       | f__Plasmodiidae                    | s__Plasmodium_falciparum        | 3.7E-03 | 1.9E-03 | 2.8E-03 | 1.4E-03 |
| Protozoa       | f__unclassified_o__Peronosporales  | s__Phytophthora_parasitica      | 2.9E-03 | 6.5E-04 | 1.1E-03 | 2.4E-04 |
| Protozoa       | f__Chrysochromulinaceae            | s__Chrysochromulina_sp._CCMP291 | 4.0E-02 | 7.2E-03 | 5.6E-02 | 9.9E-03 |
| Protozoa       | f__Plasmodiidae                    | s__Plasmodium_vivax             | 6.7E-03 | 9.9E-04 | 2.0E-02 | 6.8E-03 |
| Protozoa       | f__Perkinsidae                     | s__Perkinsus_marinus            | 5.8E-02 | 8.4E-03 | 6.8E-02 | 1.3E-02 |
| Protozoa       | f__Eimeriidae                      | s__Eimeria_brunetti             | 4.4E-03 | 7.6E-04 | 3.2E-03 | 6.9E-04 |
| Protozoa       | f__Trypanosomatidae                | s__Strigomonas_culicis          | 6.1E-03 | 1.6E-03 | 3.6E-03 | 1.1E-03 |
| Protozoa       | f__Plasmodiidae                    | s__Plasmodium_chabaudi          | 4.5E-03 | 9.4E-04 | 8.7E-03 | 4.5E-03 |
| Protozoa       | f__unclassified_d__Eukaryota       | s__Blastocystis_hominis         | 1.0E-02 | 3.0E-03 | 3.1E-03 | 6.1E-04 |
| Protozoa       | f__unclassified_o__Dictyosteliida  | s__Acytostelium_subglobosum     | 7.1E-02 | 1.3E-02 | 6.4E-02 | 1.5E-02 |
| Protozoa       | f__Trichomonadidae                 | s__Trichomonas_vaginalis        | 2.9E-01 | 2.0E-02 | 2.8E-01 | 2.2E-02 |
| Protozoa       | f__unclassified_c__Ichthyosporae   | s__Capsaspora_owczarzaki        | 4.9E-03 | 2.0E-03 | 2.2E-03 | 6.0E-04 |

|          |                                   |                                            |         |         |         |         |
|----------|-----------------------------------|--------------------------------------------|---------|---------|---------|---------|
| Protozoa | f__unclassified_d__Eukaryota      | s__Entamoeba_dispar                        | 9.7E-02 | 1.6E-02 | 1.2E-01 | 2.2E-02 |
| Protozoa | f__Parameciidae                   | s__Paramecium_tetraurelia                  | 9.3E-03 | 3.4E-03 | 2.5E-03 | 1.0E-03 |
| Protozoa | f__Monodopsidaceae                | s__Nannochloropsis_gaditana                | 3.2E-02 | 4.3E-03 | 2.4E-02 | 5.0E-03 |
| Protozoa | f__Apusomonadidae                 | s__Thecamonas_trahens                      | 1.4E-03 | 2.4E-04 | 1.5E-03 | 6.0E-04 |
| Protozoa | f__unclassified_d__Eukaryota      | s__Entamoeba_invadens                      | 1.5E-02 | 8.3E-03 | 1.9E-03 | 1.3E-03 |
| Protozoa | f__unclassified_o__Dictyosteliida | s__Dictyostelium_purpureum                 | 1.1E-02 | 2.4E-03 | 1.6E-02 | 3.9E-03 |
| Protozoa | f__unclassified_d__Eukaryota      | s__Blastocystis_sp._ST4                    | 1.2E-02 | 4.7E-03 | 1.9E-02 | 7.3E-03 |
| Protozoa | f__Vahlkampfiidae                 | s__Naegleria_gruberi                       | 1.2E-02 | 4.6E-03 | 7.7E-03 | 4.0E-03 |
| Fungi    | f__Pseudeurotiaceae               | s__Pseudogymnoascus_sp._VKM_F4515_(FW2607) | 3.4E-03 | 1.3E-03 | 8.3E-03 | 6.2E-03 |
| Fungi    | f__Cucurbitariaceae               | s__Pyrenochaeta_sp._DS3sAY3a               | 2.0E-03 | 6.8E-04 | 1.2E-03 | 4.5E-04 |
| Fungi    | f__Clavicipitaceae                | s__Pochonia_chlamydosporia                 | 9.7E-04 | 3.3E-04 | 1.4E-03 | 5.0E-04 |
| Fungi    | f__Enterocytozoonidae             | s__Enterocytozoon_bieneusi                 | 1.6E-01 | 1.6E-02 | 1.3E-01 | 1.5E-02 |
| Fungi    | f__Cystofilobasidiaceae           | s__Xanthophyllumycetes_dendrorhous         | 1.7E-03 | 5.5E-04 | 8.5E-04 | 2.8E-04 |
| Fungi    | f__Ophiostomataceae               | s__Sporothrix_schenckii                    | 1.7E-02 | 6.6E-03 | 1.0E-02 | 4.3E-03 |
| Fungi    | f__Debaryomycetaceae              | s__Scheffersomyces_stipitis                | 6.2E-03 | 1.0E-03 | 6.6E-03 | 1.5E-03 |
| Fungi    | f__Plectosphaerellaceae           | s__Verticillium_longisporum                | 4.6E-02 | 1.1E-02 | 5.0E-02 | 9.3E-03 |
| Fungi    | f__Metschnikowiaceae              | s__Clavispora_lusitaniae                   | 1.9E-02 | 5.4E-03 | 3.6E-02 | 7.7E-03 |
| Fungi    | f__unclassified_p__Cryptomycota   | s__Rozella_allomycis                       | 3.9E-03 | 6.2E-04 | 3.2E-03 | 5.2E-04 |
| Fungi    | f__Trichomonascaceae              | s__Sugiyamaella_lignohabitans              | 1.1E-03 | 3.1E-04 | 3.2E-03 | 1.0E-03 |
| Fungi    | f__Mortierellaceae                | s__Mortierella_verticillata                | 2.1E-03 | 7.5E-04 | 3.6E-03 | 1.9E-03 |
| Fungi    | f__Pseudeurotiaceae               | s__Pseudogymnoascus_sp._VKM_F3808          | 3.0E-03 | 7.4E-04 | 6.4E-03 | 3.5E-03 |
| Fungi    | f__Saccharomycetaceae             | s__Saccharomyces_cerevisiae                | 5.8E-02 | 1.6E-02 | 5.5E-02 | 1.4E-02 |
| Fungi    | f__Myxotrichaceae                 | s__Oidiodendron_maius                      | 1.3E-03 | 3.9E-04 | 2.5E-03 | 1.0E-03 |
| Fungi    | f__Microascaceae                  | s__Scedosporium_apiospermum                | 3.6E-03 | 1.4E-03 | 2.5E-03 | 7.5E-04 |
| Fungi    | f__Corticiaceae                   | s__Cylindrobasidium_torrendii              | 7.2E-03 | 2.3E-03 | 6.6E-03 | 3.0E-03 |
| Fungi    | f__Rhizopodaceae                  | s__Rhizopus_microsporus                    | 4.0E-02 | 1.2E-02 | 6.5E-02 | 1.4E-02 |
| Fungi    | f__Ustilaginaceae                 | s__Moesziomyces_antarcticus                | 2.4E-03 | 5.6E-04 | 2.2E-03 | 5.9E-04 |
| Fungi    | f__Herpotrichiellaceae            | s__Exophiala_spinifera                     | 1.8E-03 | 9.9E-04 | 1.9E-03 | 9.8E-04 |
| Fungi    | f__Pleosporaceae                  | s__Pyrenophora_triticirepentis             | 2.3E-02 | 5.3E-03 | 2.6E-02 | 5.9E-03 |
| Fungi    | f__Lasiosphaeriaceae              | s__Podospira_anserina                      | 8.5E-03 | 6.0E-03 | 2.3E-03 | 1.0E-03 |
| Fungi    | f__Aspergillaceae                 | s__Aspergillus_niger                       | 7.7E-03 | 2.4E-03 | 5.2E-03 | 2.1E-03 |
| Fungi    | f__Phaffomycetaceae               | s__Cyberlindnera_jadinii                   | 1.2E-03 | 3.0E-04 | 3.9E-03 | 1.7E-03 |

|       |                         |                                            |         |         |         |         |
|-------|-------------------------|--------------------------------------------|---------|---------|---------|---------|
| Fungi | f__Mucoraceae           | s__Mucor_ambiguus                          | 6.7E-02 | 9.4E-03 | 5.1E-02 | 7.0E-03 |
| Fungi | f__Cordycipitaceae      | s__Beauveria_bassiana                      | 2.6E-01 | 2.8E-02 | 2.4E-01 | 2.5E-02 |
| Fungi | f__Ophiocordycipitaceae | s__Ophiocordyceps_sinensis                 | 5.5E-03 | 1.0E-03 | 5.2E-03 | 1.0E-03 |
| Fungi | f__Debaryomycetaceae    | s__Candida_parapsilosis                    | 9.7E-03 | 3.2E-03 | 1.0E-02 | 3.1E-03 |
| Fungi | f__Nectriaceae          | s__Neonectria_ditissima                    | 1.5E-03 | 3.3E-04 | 1.1E-03 | 2.2E-04 |
| Fungi | f__Pseudeurotiaceae     | s__Pseudogymnoascus_sp._VKM_F4520_(FW2644) | 1.1E-02 | 5.5E-03 | 2.4E-02 | 8.8E-03 |
| Fungi | f__Glomeraceae          | s__Rhizophagus_irregularis                 | 1.1E-01 | 1.4E-02 | 1.2E-01 | 1.4E-02 |



**Table S5. Differential fecal metabolites between MDD and HC groups.**

| Metabolite                      | HC      |         | MDD     |         | Fold change<br>(MDD/HC) | Enrichment | LDA  | p value | RF<br>Importance |
|---------------------------------|---------|---------|---------|---------|-------------------------|------------|------|---------|------------------|
|                                 | mean    | sem     | mean    | sem     |                         |            |      |         |                  |
| Pipecolic Acid                  | 6.2E-02 | 5.0E-03 | 4.5E-02 | 4.7E-03 | 0.73                    | HC         | 3.86 | 3.0E-03 | 0.01555          |
| Leucine                         | 3.7E-03 | 1.2E-03 | 4.5E-03 | 2.2E-03 | 1.20                    | MDD        | 2.98 | 7.9E-03 | 0.01093          |
| Phosphate                       | 1.5E-03 | 1.2E-04 | 3.1E-03 | 9.0E-04 | 1.98                    | MDD        | 2.80 | 1.1E-03 | 0.011954         |
| Erythronic Acid Lactone         | 1.6E-02 | 1.9E-03 | 1.6E-02 | 2.7E-03 | 1.00                    | HC         | 3.11 | 3.4E-02 | 0.0211           |
| Triacetin                       | 4.5E-02 | 5.9E-03 | 3.2E-02 | 5.6E-03 | 0.71                    | HC         | 3.75 | 2.2E-03 | 0.018814         |
| L-Homoserine                    | 4.6E-06 | 4.8E-07 | 3.1E-06 | 4.3E-07 | 0.66                    | HC         | 2.77 | 3.1E-04 | 0.008073         |
| Ciliatine                       | 4.5E-02 | 6.7E-03 | 6.6E-02 | 6.9E-03 | 1.46                    | MDD        | 3.97 | 2.2E-03 | 0.011026         |
| Norvaline                       | 6.1E-02 | 7.3E-03 | 3.7E-02 | 5.3E-03 | 0.60                    | HC         | 4.09 | 7.2E-03 | 0.013604         |
| Thymine                         | 2.8E-03 | 3.9E-04 | 1.4E-03 | 2.5E-04 | 0.52                    | HC         | 2.79 | 2.4E-02 | 0.011891         |
| Z Hexose                        | 1.2E-03 | 2.7E-04 | 4.5E-04 | 9.3E-05 | 0.38                    | HC         | 2.56 | 1.8E-03 | 0.011257         |
| Ibuprofen                       | 2.5E-03 | 3.2E-04 | 1.2E-03 | 1.9E-04 | 0.50                    | HC         | 2.79 | 4.3E-05 | 0.032763         |
| N-Acetylmethionine              | 1.1E-02 | 1.4E-03 | 6.1E-03 | 1.0E-03 | 0.55                    | HC         | 3.39 | 3.2E-03 | 0.014191         |
| Proline                         | 2.4E-03 | 7.8E-04 | 5.3E-04 | 6.4E-05 | 0.22                    | HC         | 2.92 | 8.5E-03 | 0.017995         |
| Altrose                         | 4.8E-02 | 5.3E-03 | 2.1E-02 | 2.6E-03 | 0.43                    | HC         | 4.11 | 2.7E-04 | 0.020618         |
| Amidosulfonic acid              | 1.4E-02 | 1.7E-03 | 1.2E-02 | 1.8E-03 | 0.86                    | HC         | 3.16 | 2.3E-02 | 0.018271         |
| Edetic Acid                     | 1.9E-02 | 4.2E-03 | 7.8E-02 | 9.5E-03 | 4.15                    | MDD        | 4.47 | 9.3E-09 | 0.041858         |
| 2-Dodecyl-1,4-dihydroxy-Benzene | 2.4E-02 | 2.7E-03 | 1.3E-02 | 1.9E-03 | 0.54                    | HC         | 3.73 | 4.6E-03 | 0.013259         |
| Quinolinic Acid                 | 7.2E-06 | 6.5E-07 | 5.6E-06 | 7.4E-07 | 0.77                    | HC         | 2.62 | 3.9E-03 | 0.014284         |
| Beta-Mannosylglycerate          | 2.2E-03 | 2.7E-04 | 1.6E-03 | 2.2E-04 | 0.74                    | HC         | 2.54 | 1.9E-02 | 0.012635         |
| Cystine                         | 1.5E-03 | 7.3E-04 | 4.3E-04 | 6.9E-05 | 0.28                    | HC         | 2.71 | 1.8E-02 | 0.014571         |
| O-Phosphoethanolamine           | 9.6E-06 | 1.2E-06 | 4.9E-06 | 6.9E-07 | 0.51                    | HC         | 2.55 | 8.4E-03 | 0.018688         |
| Oxoproline                      | 5.4E-03 | 1.7E-03 | 3.7E-03 | 1.5E-03 | 0.68                    | HC         | 3.03 | 1.5E-02 | 0.020699         |
| Sebacic acid                    | 4.8E-03 | 1.3E-03 | 6.6E-03 | 7.6E-04 | 1.38                    | MDD        | 3.02 | 7.0E-09 | 0.081039         |
| Isocitric Acid                  | 1.1E-02 | 1.9E-03 | 2.9E-02 | 3.4E-03 | 2.60                    | MDD        | 3.94 | 8.4E-05 | 0.01876          |
| Palmitic Acid                   | 4.6E-03 | 6.4E-04 | 1.4E-03 | 3.5E-04 | 0.31                    | HC         | 3.23 | 5.2E-06 | 0.030712         |
| Glutathione                     | 8.9E-06 | 1.0E-06 | 6.3E-06 | 7.8E-07 | 0.71                    | HC         | 2.60 | 2.6E-02 | 0.00937          |
| D-Fructose                      | 1.7E-03 | 1.6E-04 | 3.0E-03 | 3.0E-04 | 1.75                    | MDD        | 2.81 | 1.6E-02 | 0.018479         |
| 2-Piperidinobenzonitrile        | 4.6E-06 | 6.1E-07 | 3.0E-06 | 6.4E-07 | 0.66                    | HC         | 2.70 | 4.7E-04 | 0.019312         |

|                                                           |         |         |         |         |      |     |      |         |          |
|-----------------------------------------------------------|---------|---------|---------|---------|------|-----|------|---------|----------|
| Alpha-D-Glucose                                           | 4.3E-02 | 7.4E-03 | 3.5E-02 | 7.4E-03 | 0.83 | HC  | 3.72 | 2.6E-02 | 0.013225 |
| Trans-4-Hydroxy-L-Proline                                 | 3.7E-03 | 8.1E-04 | 7.1E-03 | 9.4E-04 | 1.91 | MDD | 3.22 | 3.3E-03 | 0.014382 |
| Gamma-Aminobutyric Acid                                   | 6.2E-02 | 8.3E-03 | 4.7E-02 | 7.1E-03 | 0.76 | HC  | 3.94 | 4.6E-02 | 0.018114 |
| Bisphenol A                                               | 4.0E-06 | 5.0E-07 | 1.8E-06 | 3.6E-07 | 0.45 | HC  | 2.75 | 1.7E-05 | 0.022189 |
| Inosine-5'-Monophosphate                                  | 6.1E-06 | 7.1E-07 | 4.2E-06 | 5.2E-07 | 0.69 | HC  | 2.55 | 2.9E-02 | 0.009297 |
| 4-Methylbenzenesulfonamide                                | 1.4E-02 | 4.3E-03 | 5.7E-02 | 7.1E-03 | 4.00 | MDD | 4.35 | 1.2E-07 | 0.048183 |
| Trans-4-Hydroxyproline                                    | 5.5E-06 | 6.6E-07 | 3.4E-06 | 5.5E-07 | 0.61 | HC  | 2.63 | 1.1E-03 | 0.014747 |
| N-{2-hydroxyethyl}tetradecan-1-amine                      | 4.9E-03 | 8.5E-04 | 1.0E-02 | 1.1E-03 | 2.09 | MDD | 3.42 | 1.2E-03 | 0.014475 |
| Tryptophol                                                | 6.7E-06 | 8.8E-07 | 4.5E-06 | 7.7E-07 | 0.67 | HC  | 2.55 | 1.8E-03 | 0.009616 |
| Terephthalic Acid                                         | 4.4E-06 | 4.0E-07 | 3.3E-06 | 5.6E-07 | 0.75 | HC  | 2.77 | 5.8E-03 | 0.020425 |
| Homovanillic Acid                                         | 4.1E-06 | 6.1E-07 | 2.7E-06 | 5.9E-07 | 0.66 | HC  | 2.51 | 2.0E-05 | 0.014791 |
| Biphenyl                                                  | 1.0E-03 | 2.5E-04 | 2.8E-03 | 4.1E-04 | 2.69 | MDD | 2.91 | 4.0E-06 | 0.020437 |
| 4-Methyl-5-Thiazoleethanol                                | 6.6E-06 | 8.2E-07 | 3.6E-06 | 4.8E-07 | 0.54 | HC  | 2.55 | 4.1E-03 | 0.007881 |
| Itaconic Acid                                             | 9.4E-03 | 2.7E-03 | 3.6E-02 | 4.5E-03 | 3.86 | MDD | 4.15 | 2.7E-08 | 0.063836 |
| Arbutin                                                   | 3.5E-06 | 3.7E-07 | 2.5E-06 | 3.0E-07 | 0.72 | HC  | 2.78 | 2.1E-02 | 0.00856  |
| Adenosine-5-Monophosphate                                 | 1.8E-06 | 2.7E-07 | 1.0E-06 | 2.4E-07 | 0.57 | HC  | 2.91 | 3.6E-03 | 0.009432 |
| 2-Indolecarboxylic acid                                   | 2.0E-04 | 4.8E-05 | 1.7E-03 | 2.5E-04 | 8.26 | MDD | 2.86 | 7.3E-11 | 0.064682 |
| Hydrocinnamic Acid                                        | 6.4E-02 | 1.2E-02 | 2.7E-02 | 7.1E-03 | 0.42 | HC  | 4.28 | 1.2E-03 | 0.022258 |
| 2,2'-Biphenyldiol                                         | 3.2E-06 | 3.5E-07 | 2.0E-06 | 3.0E-07 | 0.63 | HC  | 2.93 | 7.0E-03 | 0.011075 |
| 1,3,5-Benzetriol                                          | 2.7E-06 | 4.0E-07 | 3.6E-06 | 5.3E-07 | 1.34 | MDD | 2.80 | 2.3E-02 | 0.017862 |
| 5,7-Dimethyl[1,2,4]triazolo[1,5-a]<br>pyrimidin-2-ylamine | 1.8E-06 | 3.5E-07 | 4.0E-06 | 1.1E-06 | 2.24 | MDD | 2.58 | 2.9E-03 | 0.015467 |
| Benzylamine                                               | 1.9E-06 | 2.6E-07 | 2.6E-06 | 3.6E-07 | 1.35 | MDD | 2.57 | 3.8E-02 | 0.007361 |

**Table S6. The influence of confounding factors on bacterial composition**

|                    |              | PCA model generated with MDD and HC samples |         |        |         |
|--------------------|--------------|---------------------------------------------|---------|--------|---------|
| Variables          |              | PC1                                         | PC2     | r2     | P-value |
| Dietary preference | High_fat     | 0.2465                                      | -0.9691 | 0.0169 | 0.486   |
|                    | High_salt    | -0.9217                                     | 0.3879  | 0.0004 | 0.981   |
|                    | High_fiber   | -0.9127                                     | -0.4087 | 0.0274 | 0.278   |
|                    | High_protein | 0.3996                                      | -0.9167 | 0.0105 | 0.605   |
| Smoking            |              | -0.2157                                     | -0.9765 | 0.0009 | 0.954   |
